# Supplementary material for: Solution-processable bipolar S,S-dioxide-dibenzothiophene chromophores for single-layer organic light-emitting diodes
Source: Royal Society of Chemistry journal article supplement (doi:10.1039/c6nj00843g), 2016-01-01
Supplement: c6nj00843g1.pdf [file c6nj00843g1.pdf]

Supporting Information for *New Journal of Chemistry*

**Solution-processable bipolar S,S-dixiide-dibenzothiophene chromophores for single-layer organic light-emitting diodes**

Sen Zhao, Yuan Xie, Junfei Liang, Ting Guo, Lei Ying\*, Hongbin Wu, Wei Yang, Junbiao Peng and Yong Cao

Institute of Polymer Optoelectronic Materials and Devices, State Key Laboratory of Luminescent Materials and Devices, South China University of Technology, Guangzhou 510640, China

E-mail: msleiyi@scut.edu.cn (L.Y.)

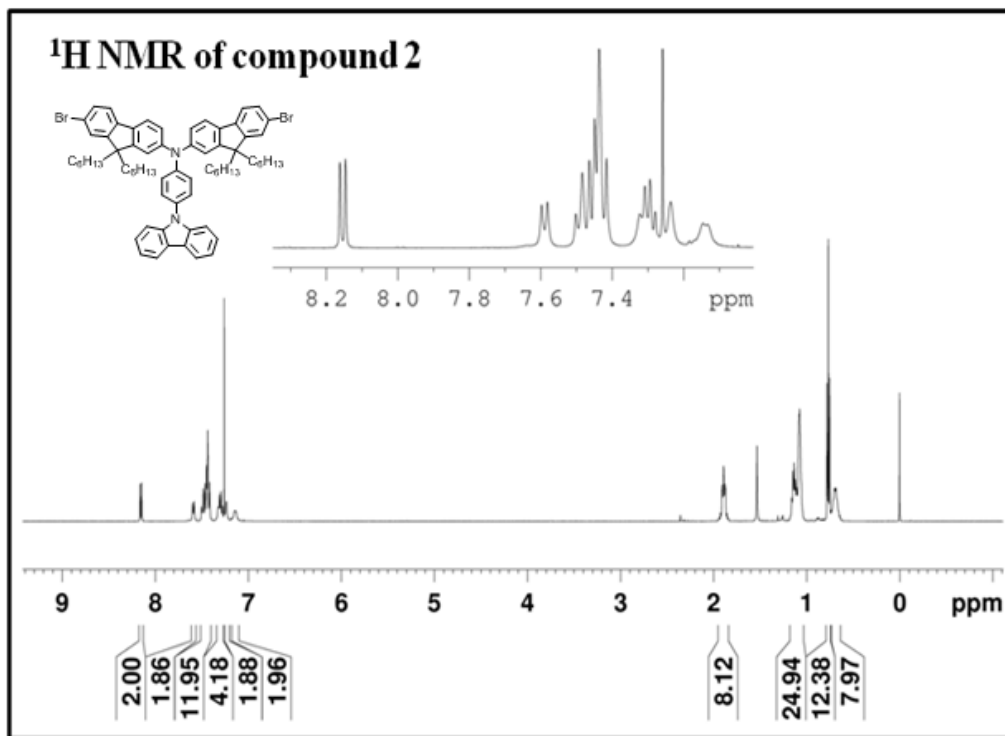

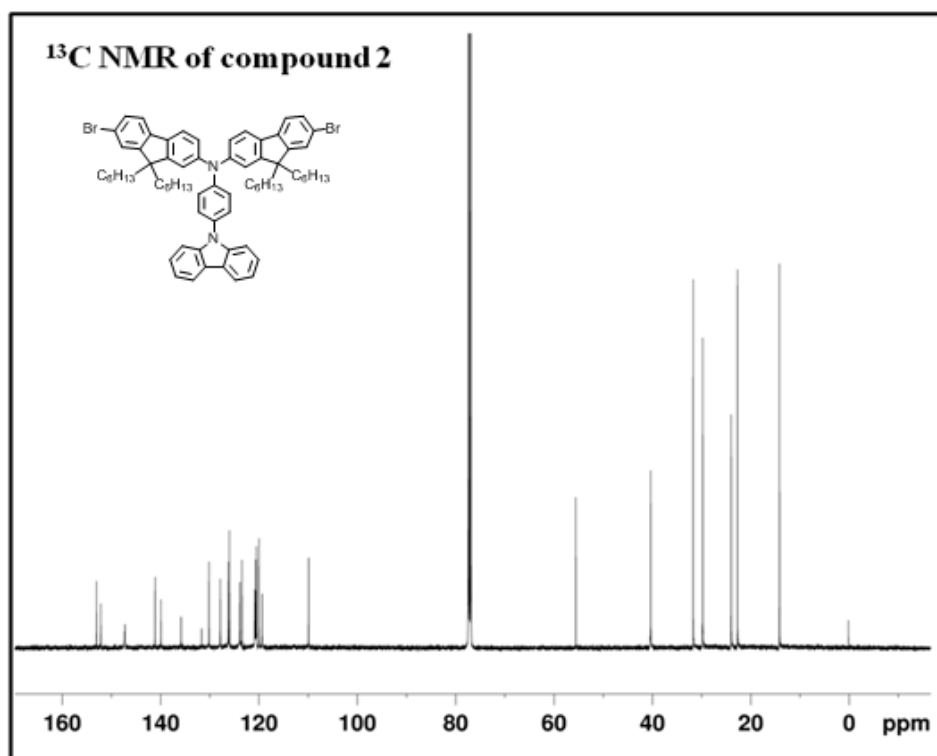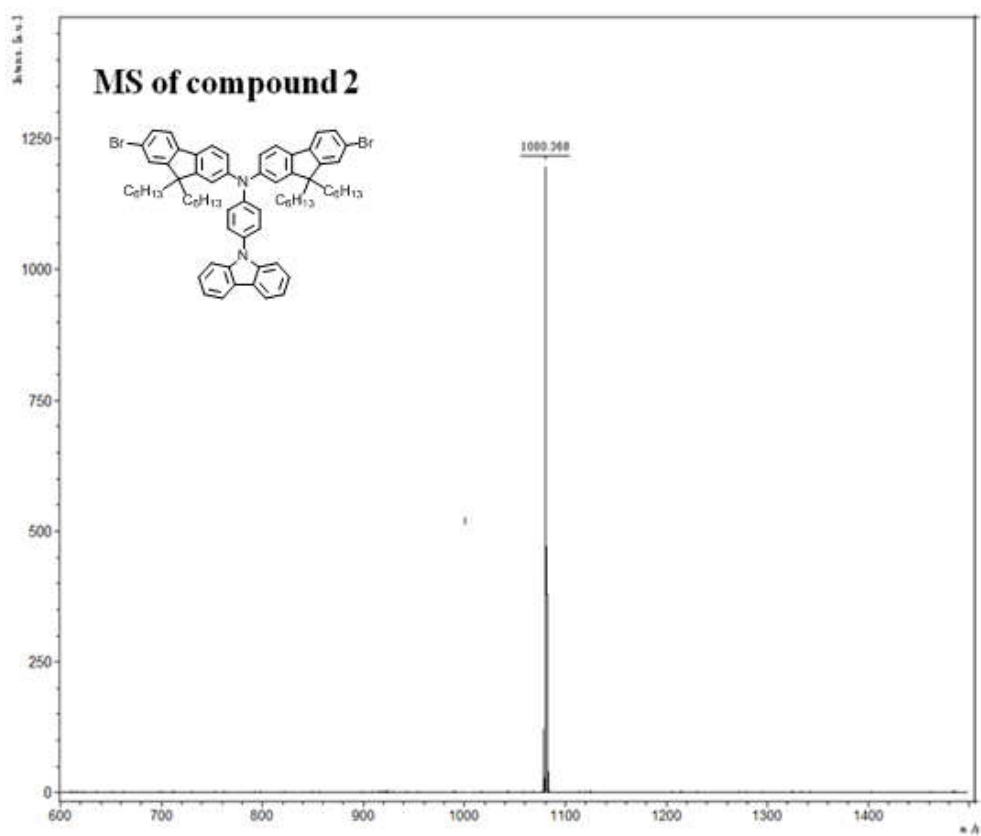

**Fig. S1** <sup>1</sup>H NMR, <sup>13</sup>C NMR and MS spectra of the compound 2

### <sup>1</sup>H NMR of compound 3

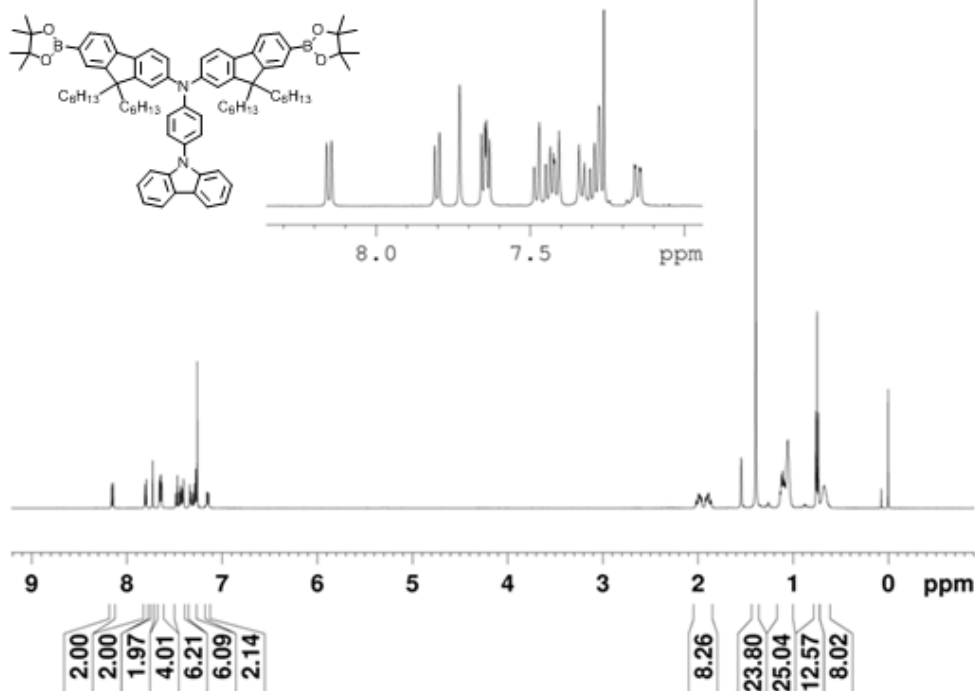

### <sup>13</sup>C NMR of compound 3

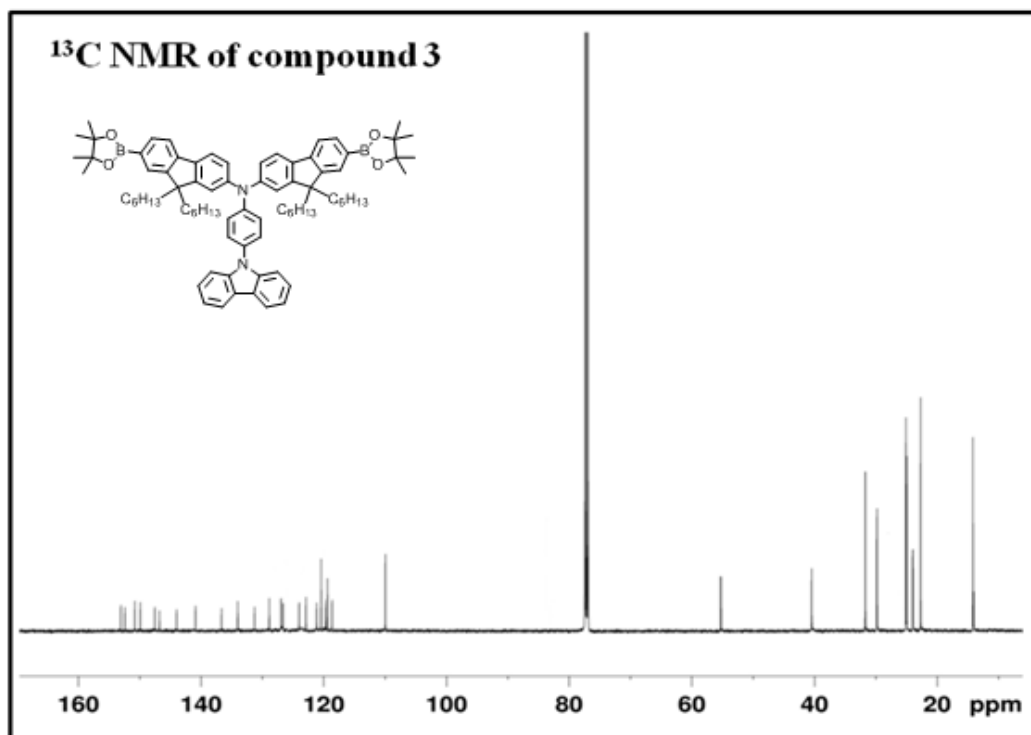

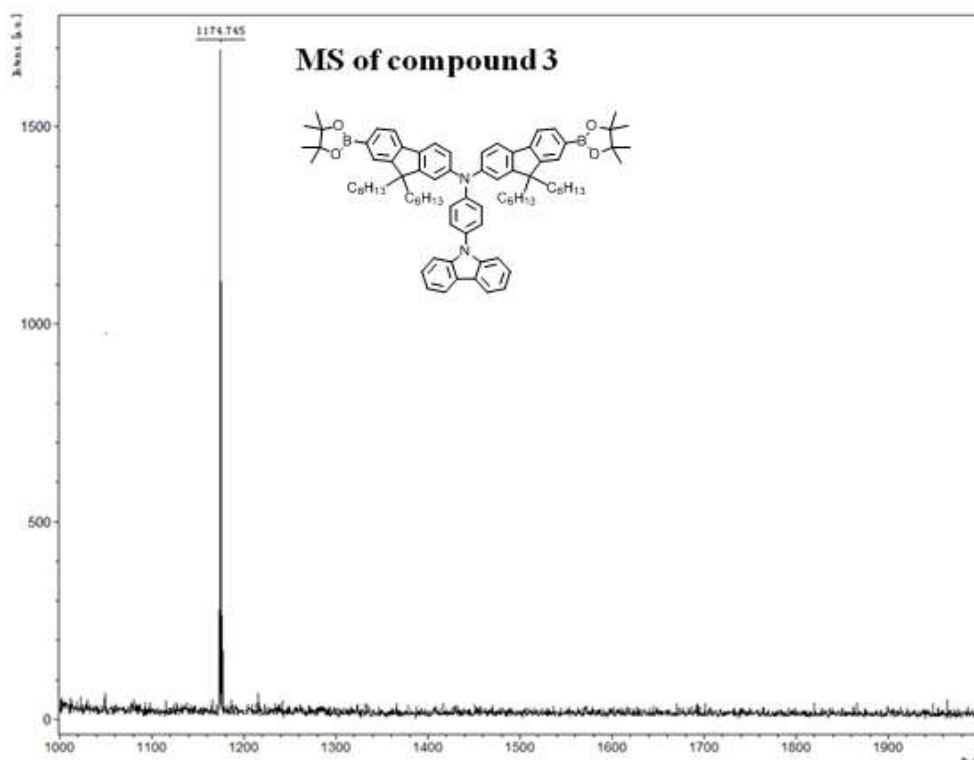

**Fig. S2**  $^1\text{H}$  NMR,  $^{13}\text{C}$  NMR and MS spectra of the compound 3

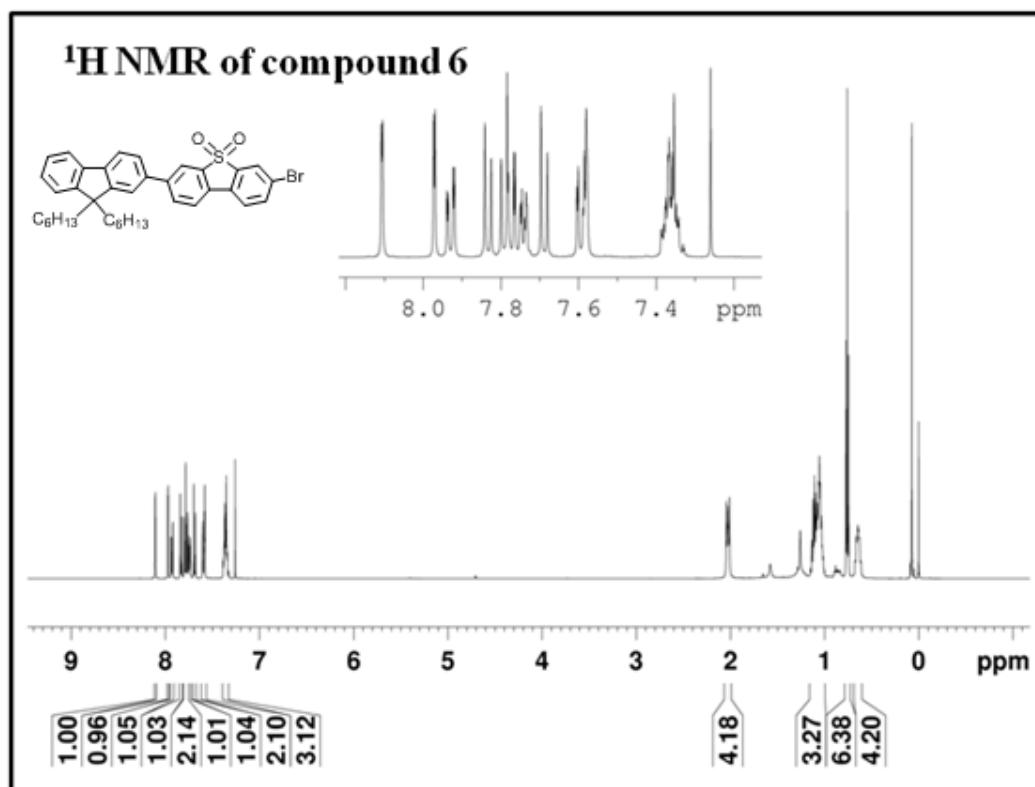

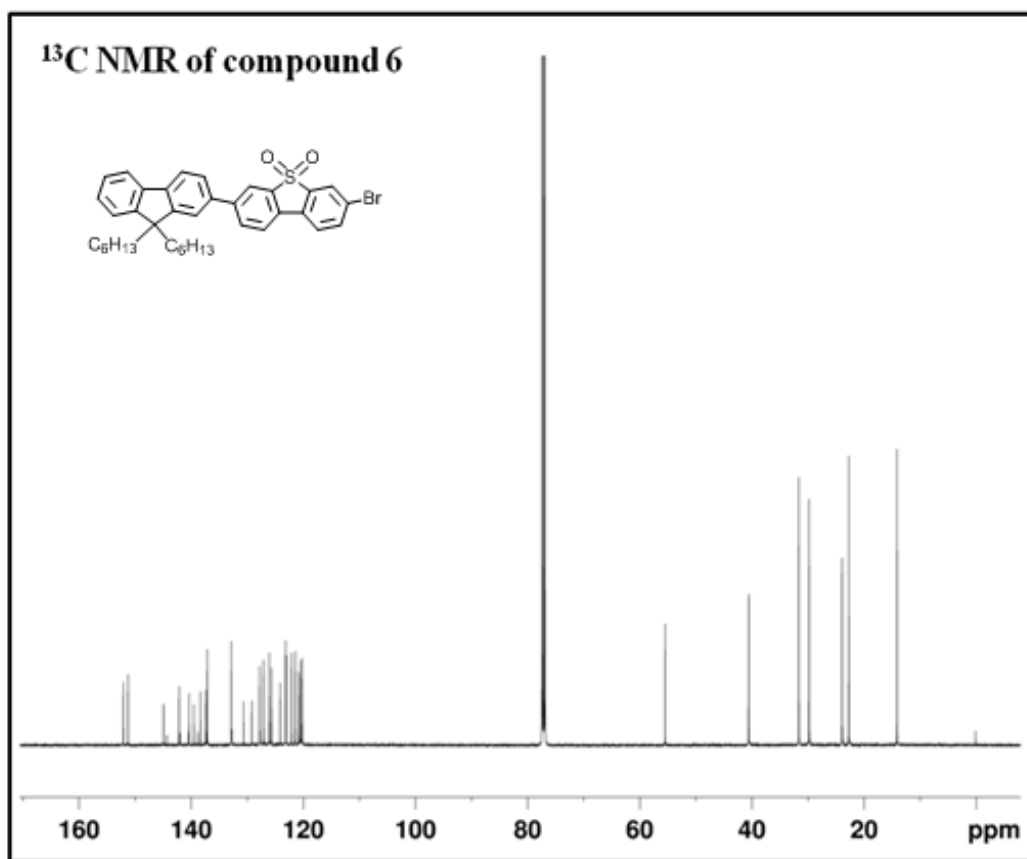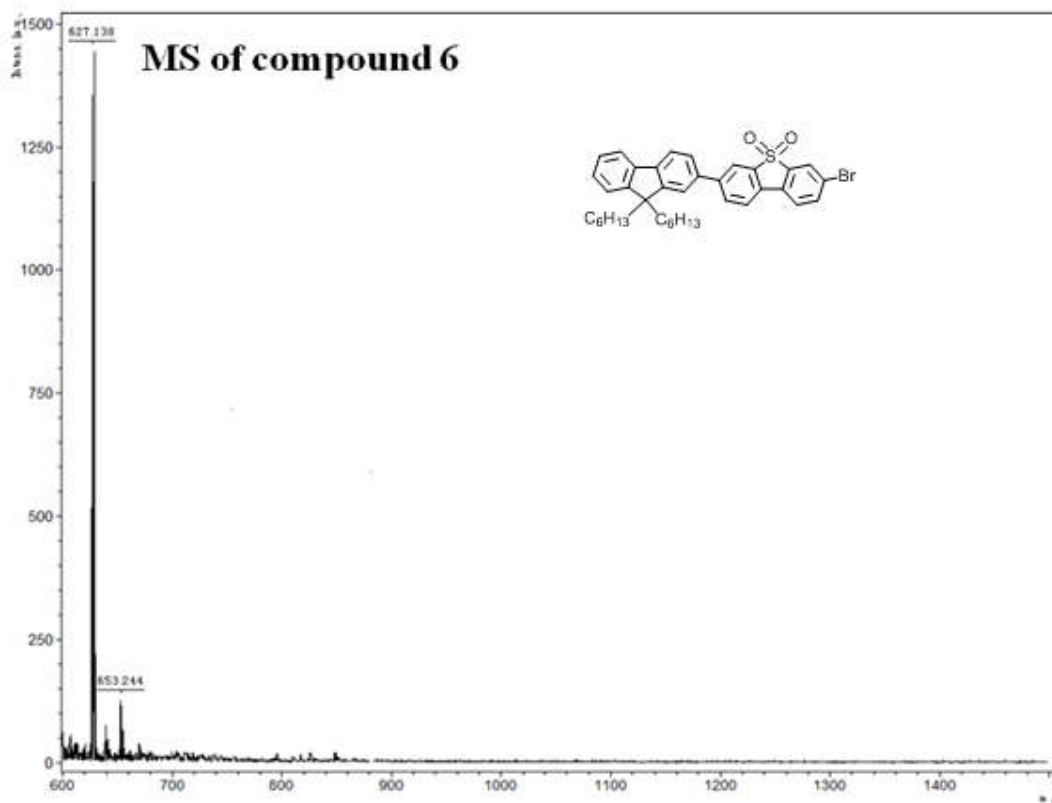

**Fig. S3** <sup>1</sup>H NMR, <sup>13</sup>C NMR and MS spectra of the compound 6

### <sup>1</sup>H NMR of compound 7

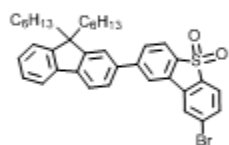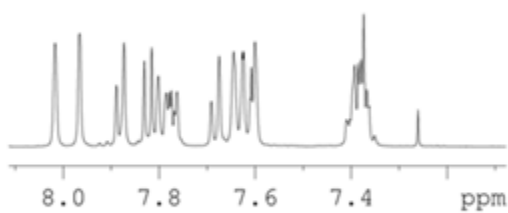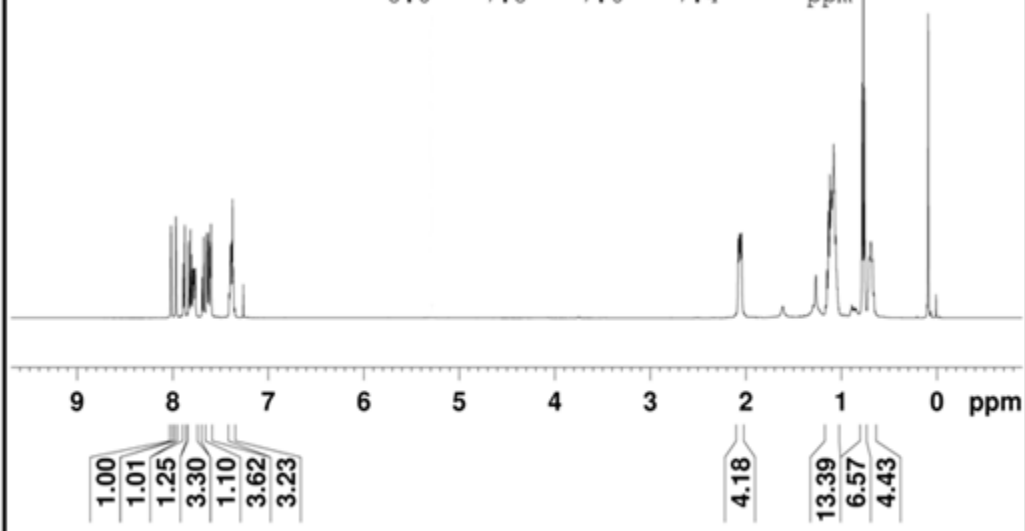

### <sup>13</sup>C NMR of compound 7

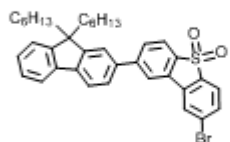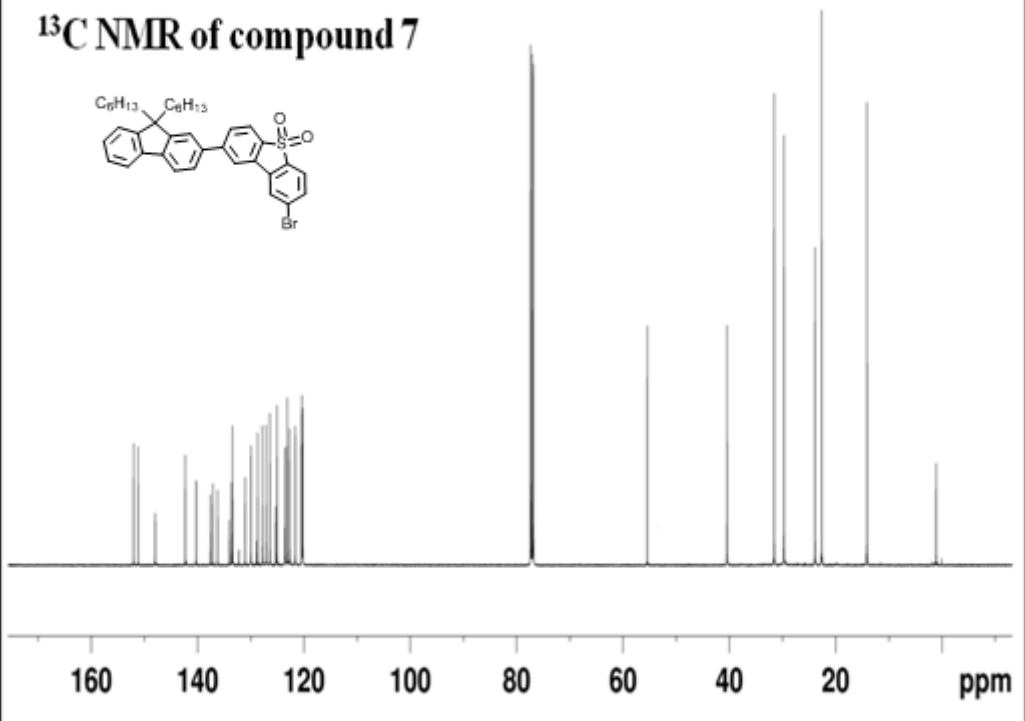

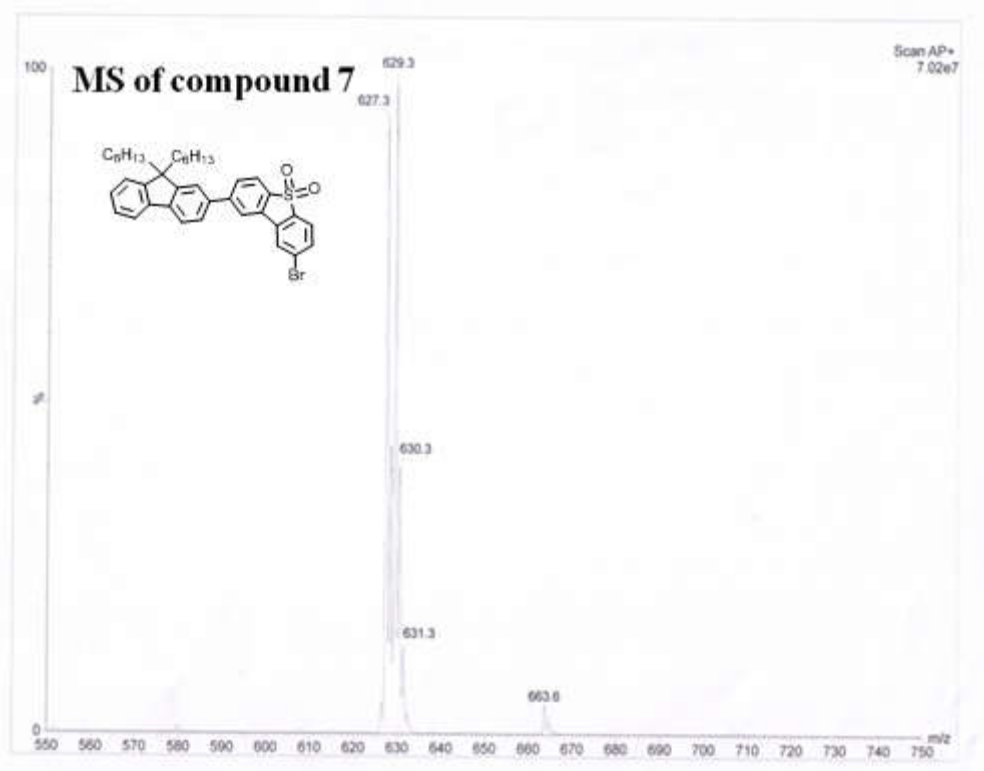

**Fig. S4**  $^1\text{H}$  NMR,  $^{13}\text{C}$  NMR and MS spectra of the compound 7

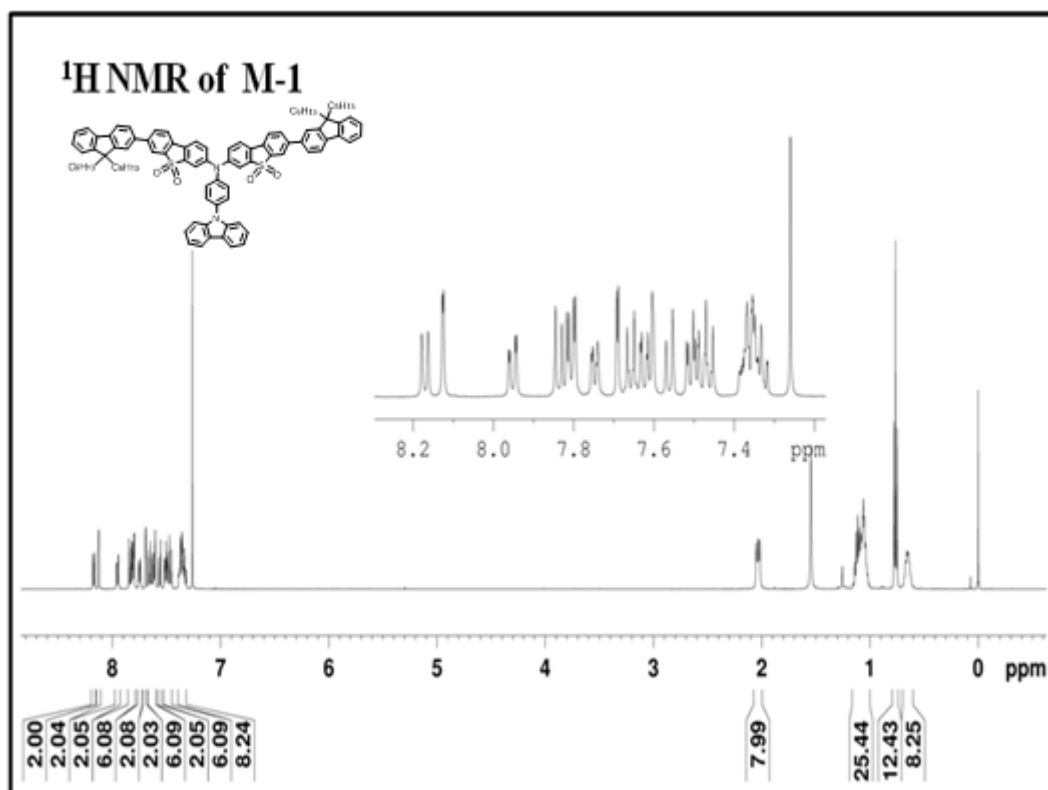

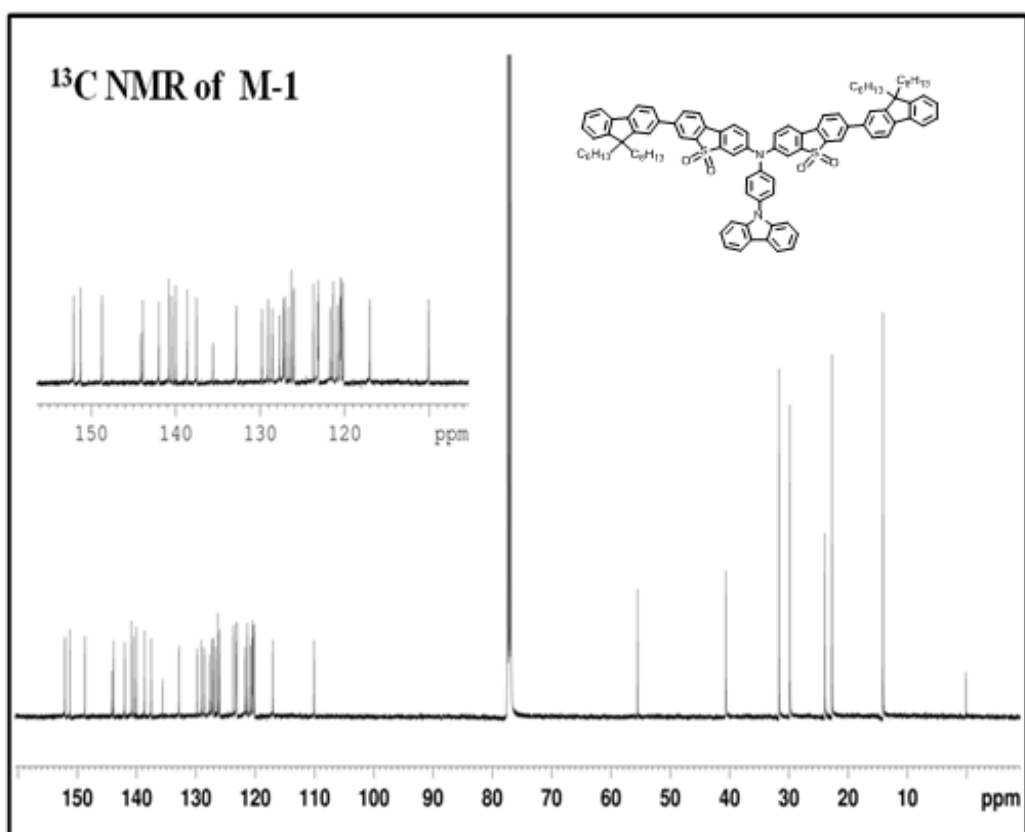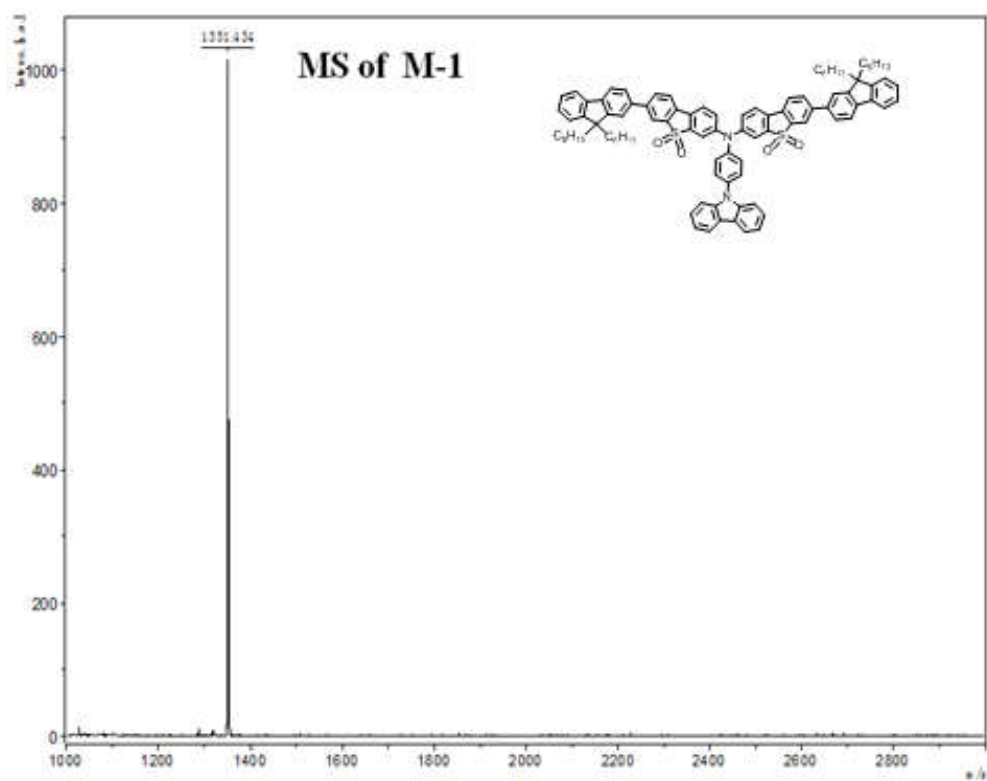

**Fig. S5**  $^1\text{H}$  NMR,  $^{13}\text{C}$  NMR and MS spectra of the compound **M-1**



### <sup>1</sup>H NMR of M-2

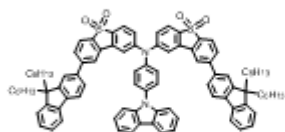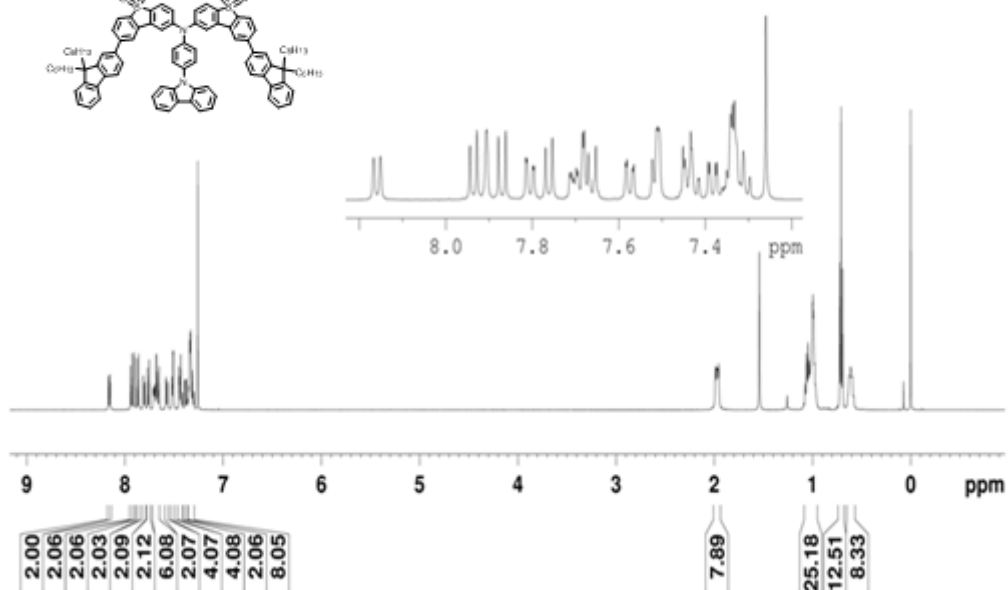

### <sup>13</sup>C NMR of M-2

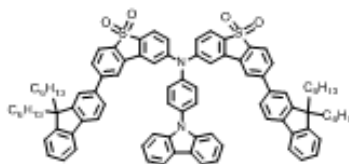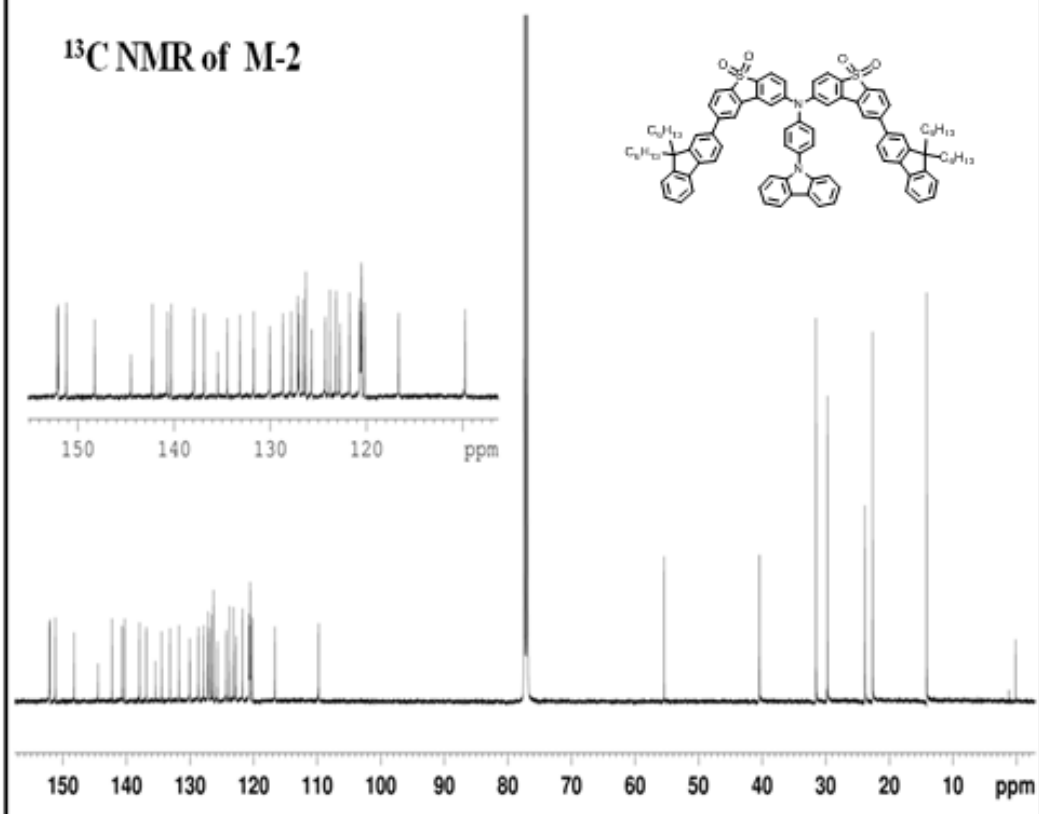

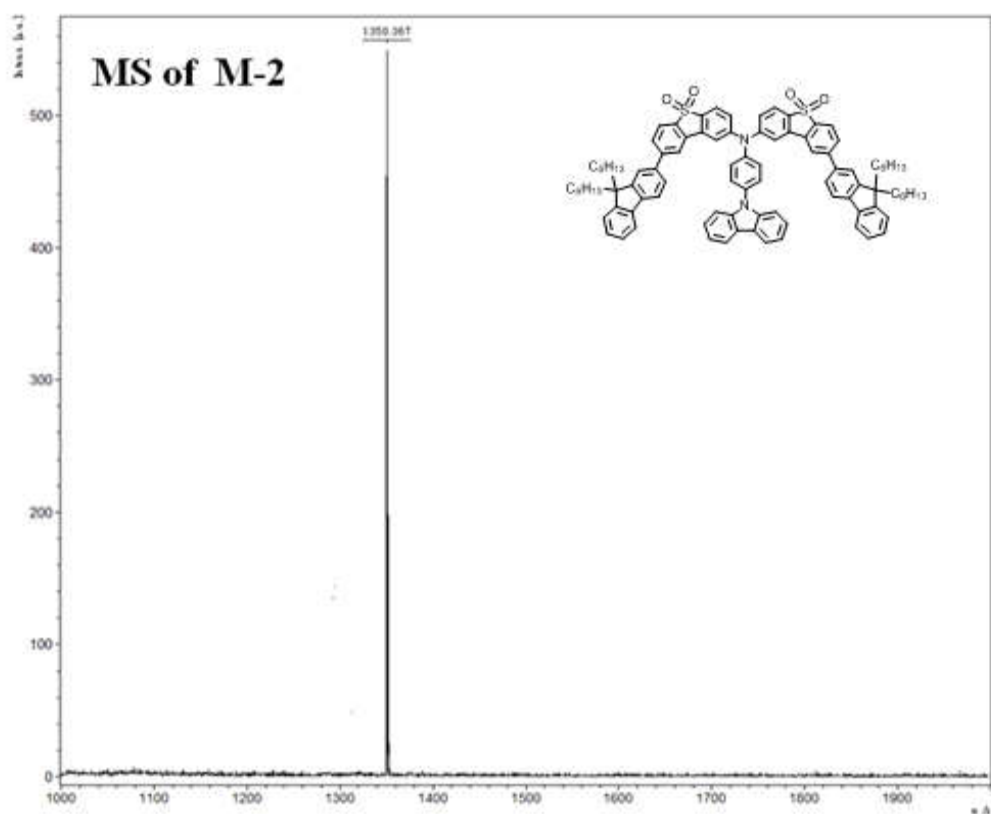

**Fig. S6**  $^1\text{H}$  NMR,  $^{13}\text{C}$  NMR and MS spectra of the compound **M-2**

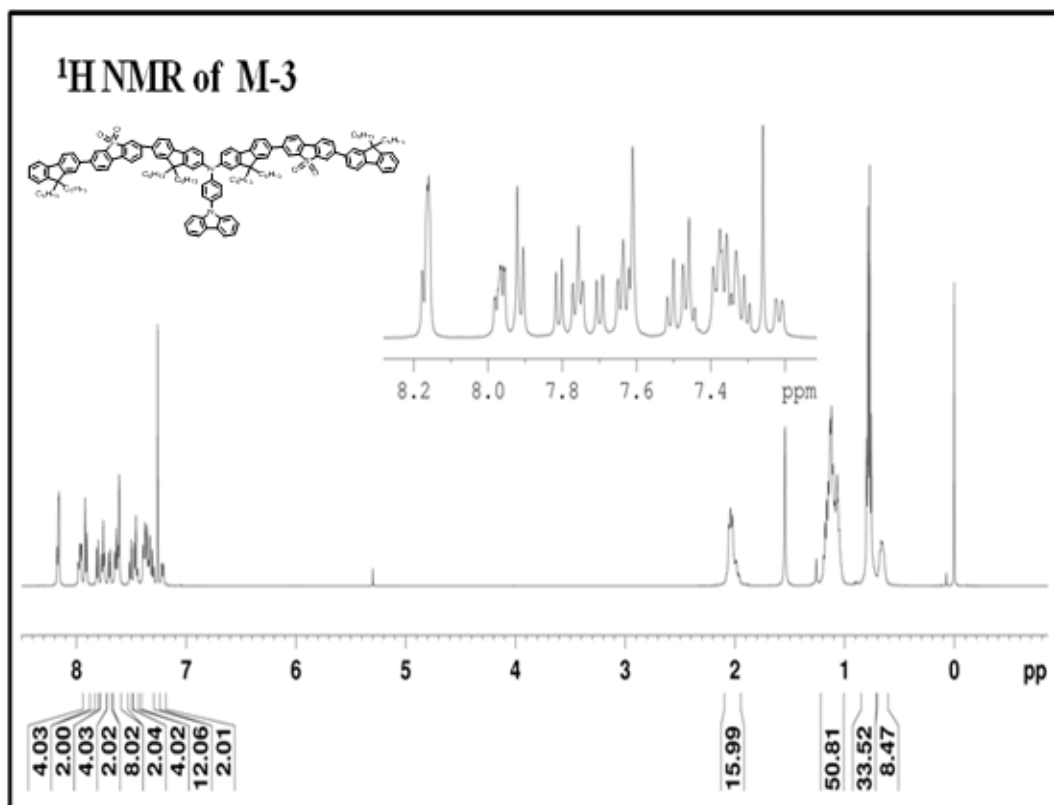

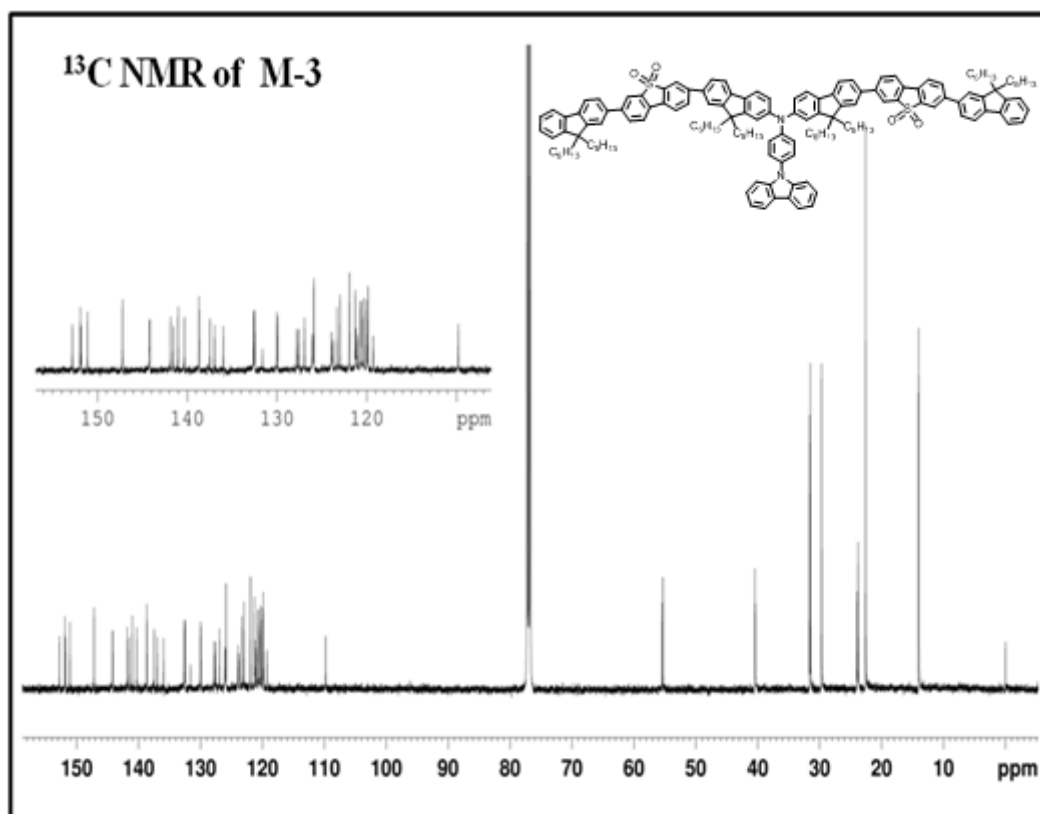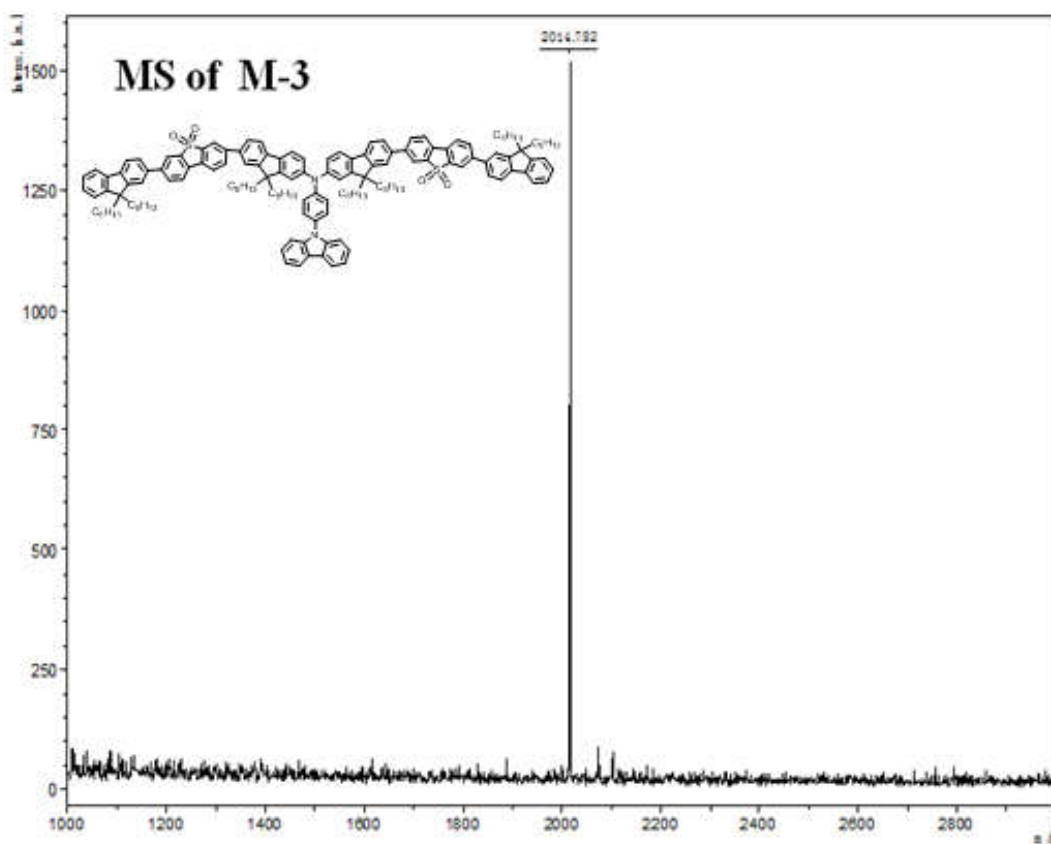

Fig. S7 <sup>1</sup>H NMR, <sup>13</sup>C NMR and MS spectra of the compound M-3

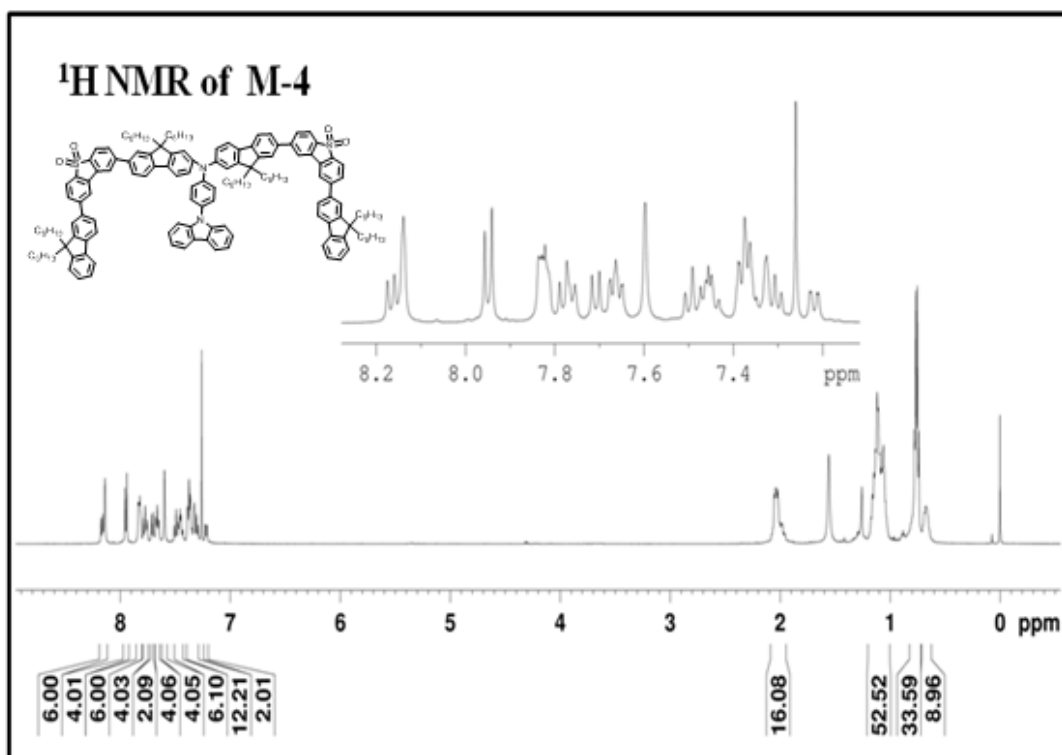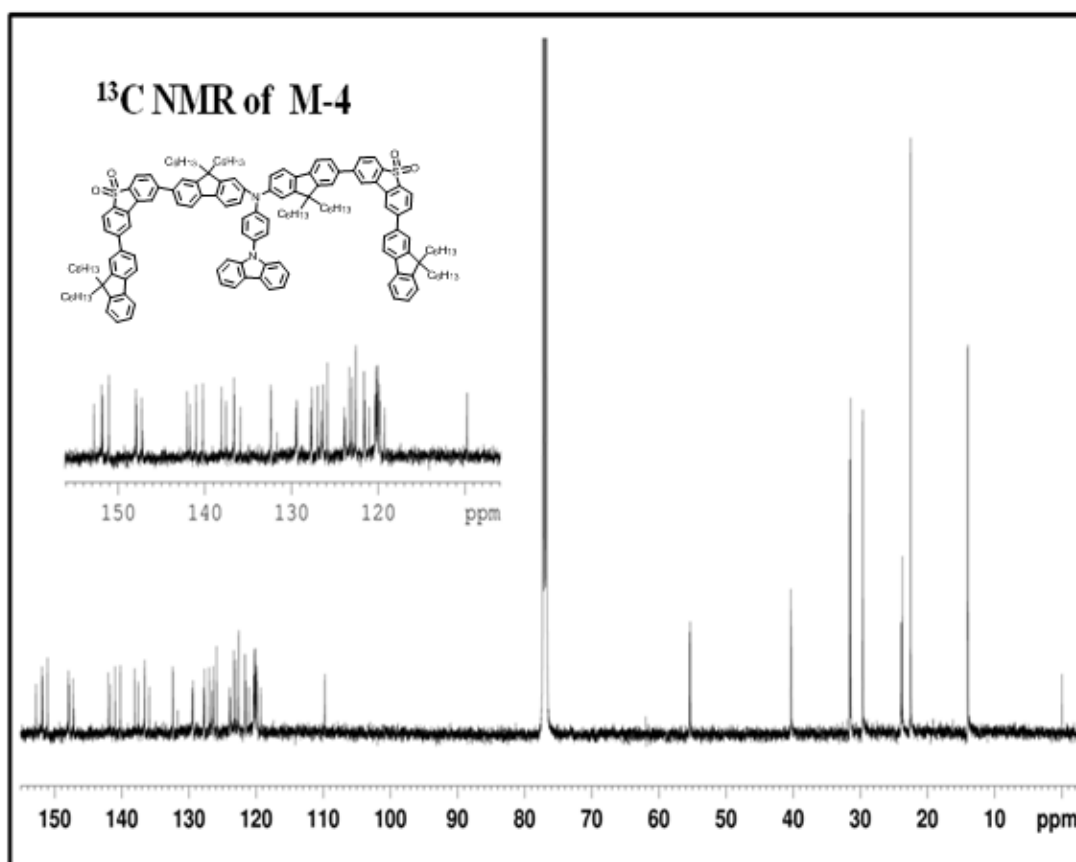

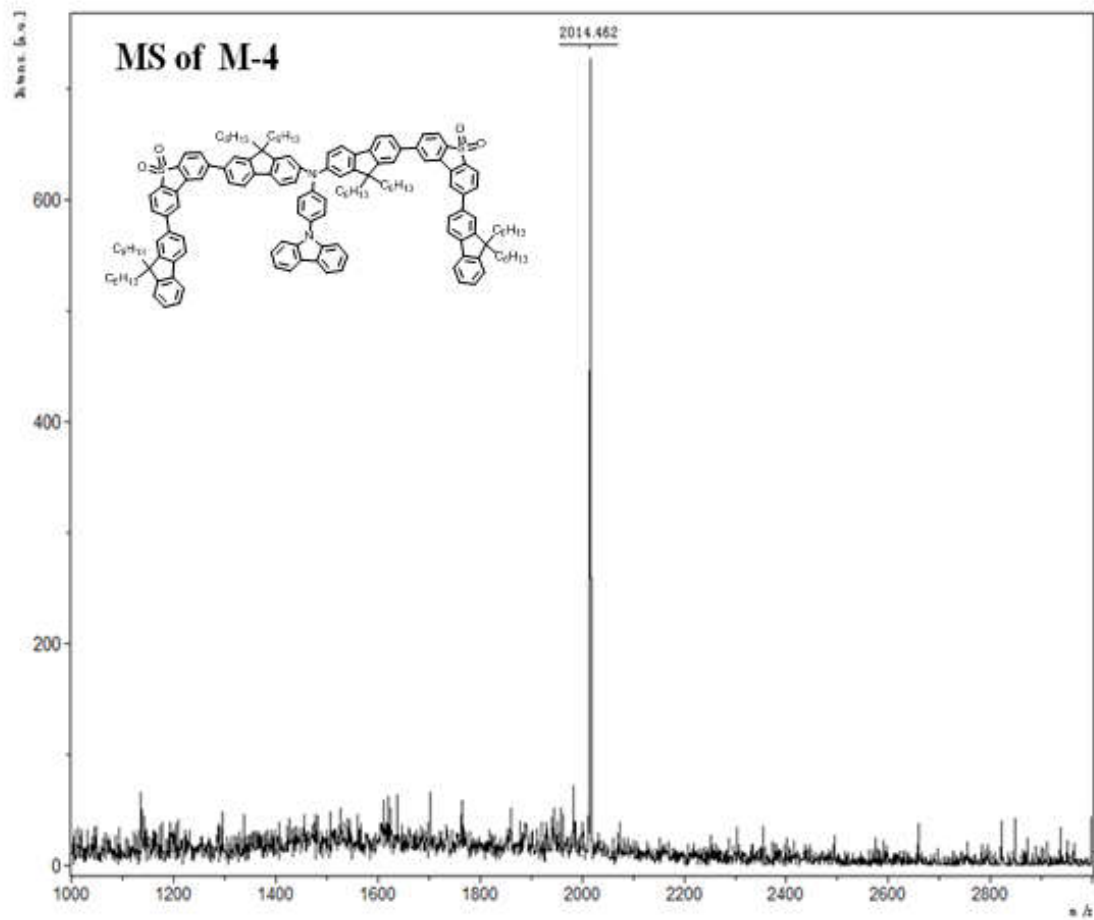

**Fig. S8**  $^1\text{H}$  NMR,  $^{13}\text{C}$  NMR and MS spectra of the compound **M-4**

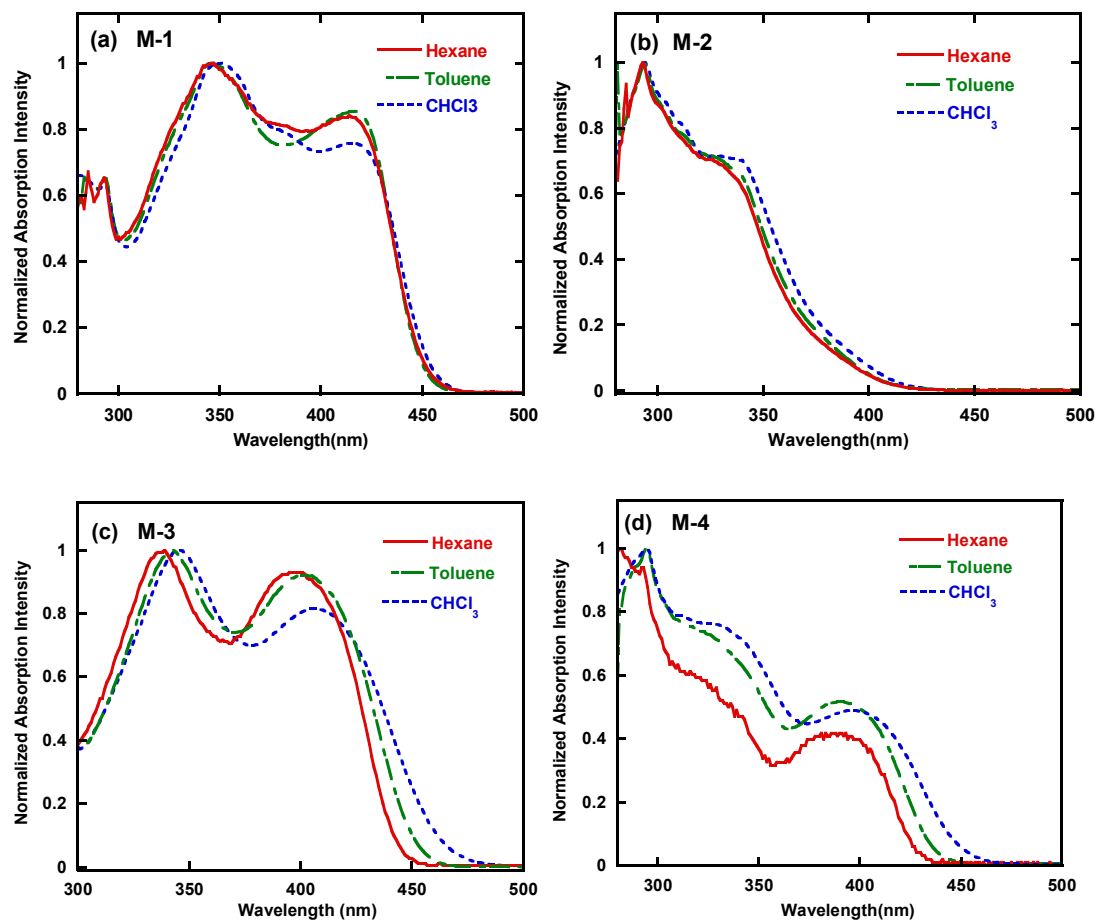

**Fig. S9** UV-Vis absorption spectra of compounds in different solutions.

**Table S1**  $E_T$  and Stokes shift values for compounds in solution.

| compound   | $E_T(30)$ (Kcal/mol) |      |                 | Stokes shift ( $\text{cm}^{-1}$ ) |      |                 |
|------------|----------------------|------|-----------------|-----------------------------------|------|-----------------|
|            | Hex                  | Tol  | $\text{CHCl}_3$ | Hex                               | Tol  | $\text{CHCl}_3$ |
|            | 3                    |      |                 |                                   |      |                 |
| <b>M-1</b> | 31.0                 | 33.9 | 39.1            | 1369                              | 2463 | 3589            |
| <b>M-2</b> | 31.0                 | 33.9 | 39.1            | 6232                              | 7784 | 9553            |
| <b>M-3</b> | 31.0                 | 33.9 | 39.1            | 2959                              | 3508 | 5691            |
| <b>M-4</b> | 31.0                 | 33.9 | 39.1            | 2517                              | 3452 | 5985            |
